# Supplementary material
Source: publisher figshare collection journal article supplement (https://acs.figshare.com/ndownloader/files/4256689)
Supplement: Supplementary file 1 [file 4256689]

# **Heterobimetallic Copper(II) Uranyl Carboxyphenylphosphonates**

Pius O. Adelani and Thomas E. Albrecht-Schmitt<sup>\*</sup>

*A Contribution from the* Department of Civil Engineering and Geological Sciences

and Department of Chemistry and Biochemistry

University of Notre Dame, Notre Dame, Indiana 46556

**Supporting Information**

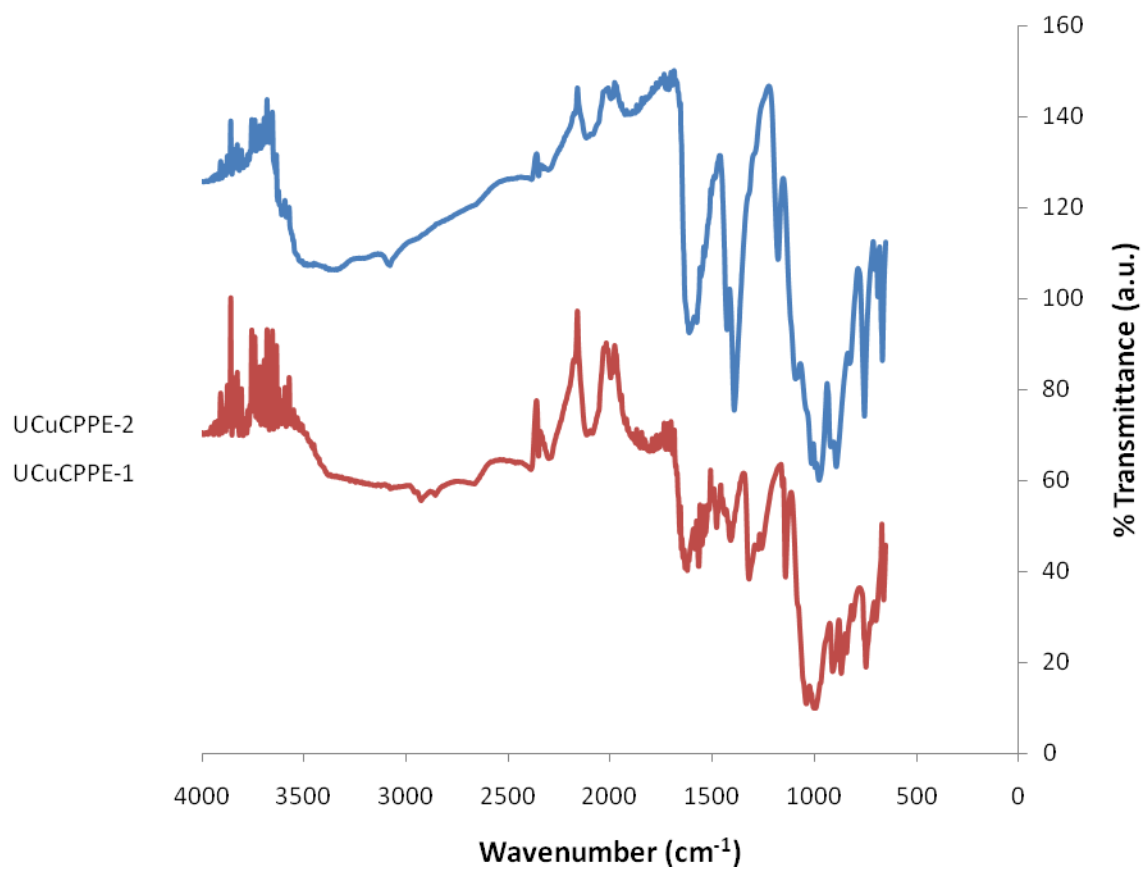

Infrared spectra of **UCuCPPE-1** and **UCuCPPE-2**
